# Supplementary material for: MiR-19b suppresses PTPRG to promote breast tumorigenesis
Source: PubMed Central journal article supplement (PMC5325428; doi:10.18632/oncotarget.11799), 2016-09-01
Supplement: oncotarget-07-64100-s001.pdf [file oncotarget-07-64100-s001.pdf]

**MiR-19b suppresses PTPRG to promote breast tumorigenesis****Supplementary Materials****Supplementary Table S1: Patients' characteristics**

| Case No. | Clinical History | Gender | TNM Stage |
|----------|------------------|--------|-----------|
| BCT #1   | IDC              | Female | II        |
| BCT #2   | IDC              | Female | II        |
| BCT #3   | IDC              | Female | II        |
| BCT #4   | IDC              | Female | II        |
| BCT #5   | IDC              | Female | II        |
| BCT #6   | IDC              | Female | III       |
| BCT #7   | IDC              | Female | II-III    |
| BCT #8   | IDC              | Female | II-III    |
| BCT #9   | IDC              | Female | I-II      |
| BCT#10   | IDC              | Female | II        |
| BCT#11   | IDC              | Female | II        |
| BCT#12   | IDC              | Female | II        |
| BCT#13   | IDC              | Female | II        |
| BCT#14   | IDC              | female | II        |

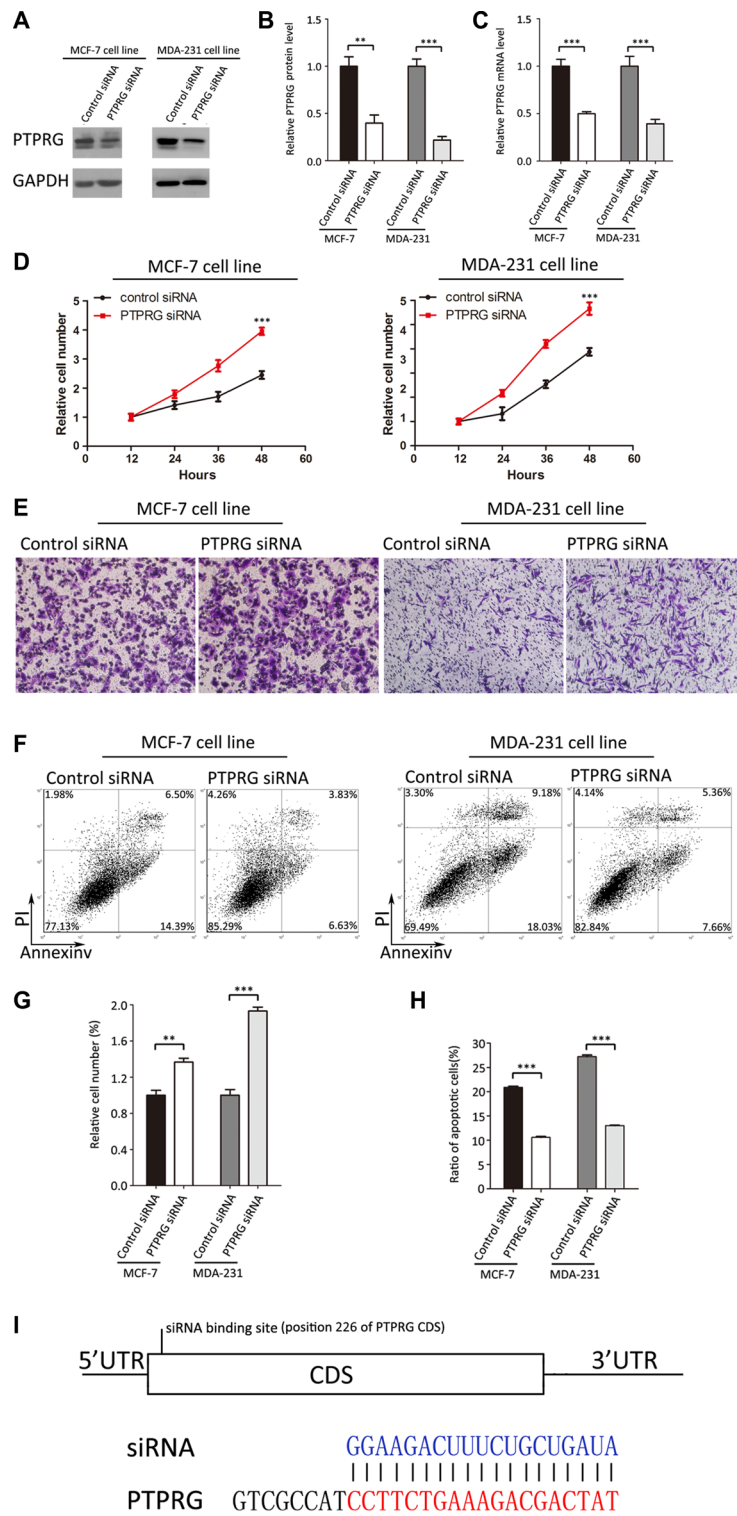

**Supplementary Figure S1: Effects of PTPRG expression on the proliferation, migration and apoptosis of MCF-7 cells.** (A and B) Western blotting analysis of the PTPRG protein levels in MCF-7 cells and MDA-231 cells treated with scrambled control siRNA, PTPRG siRNA. (C) Quantitative RT-PCR analysis of PTPRG mRNA levels in those cells treated with scrambled control siRNA, PTPRG siRNA. (D) CCK8 cell viability assays were performed 12, 24, 36 and 48 h after the transfection of the MCF-7 cells with either scrambled control siRNA or PTPRG siRNA. (E and G) Transwell migration assays were performed after the transfection of those cells with scrambled control siRNA or PTPRG siRNA. (F and H) Apoptosis assays were performed after the transfection of those cells with scrambled control siRNA or PTPRG siRNA. (I) Schematic diagram for knockdown of PTPRG by siRNAs. \*\*\* $P < 0.001$ ; \*\* $P < 0.01$ .
